# Supplementary material
Source: PubMed Central journal article supplement (PMC7602340)
Supplement: 40560_2020_501_MOESM1_ESM.pdf [file 40560_2020_501_MOESM1_ESM.pdf]

**Final logistic regression model for death at 90 days**

| Variable                                        | OR   | 95% CI for OR | p-value |
|-------------------------------------------------|------|---------------|---------|
| SAPS 3                                          | 1.08 | 1.07 - 1.08   | <0.001  |
| Age                                             | 1.02 | 1.01 - 1.02   | <0.001  |
| Acute surgery                                   | 0.80 | 0.70 - 0.92   | 0.001   |
| Mean NEMS-score                                 | 1.00 | 1.00 - 1.01   | 0.004   |
| Cardiac arrest and asfyxia                      | 3.56 | 2.92 - 4.33   | <0.001  |
| Cerebrovascular event, except SAH               | 3.58 | 2.65 - 4.85   | <0.001  |
| Intoxication                                    | 0.41 | 0.25 - 0.65   | <0.001  |
| Transplantation                                 | 0.25 | 0.14 - 0.44   | <0.001  |
| Traumatic brain injury                          | 2.11 | 1.55 - 2.86   | <0.001  |
| COPD/asthma                                     | 1.61 | 1.34 - 1.94   | <0.001  |
| Cardiac disease, except cardiac arrest          | 1.68 | 1.32 - 2.14   | <0.001  |
| Subarachnoid hemorrhage                         | 2.51 | 1.39 - 4.55   | 0.002   |
| Pancreatitis/cholangitis                        | 0.48 | 0.27 - 0.86   | 0.013   |
| Acute aortic rupture or dissection              | 1.76 | 1.23 - 2.52   | 0.002   |
| Gastrointestinal bleeding                       | 1.50 | 1.12 - 2.00   | 0.007   |
| Acute abdomen, except gastrointestinal bleeding | 1.52 | 1.12 - 2.07   | 0.007   |
| Respiratory tract infection                     | 1.36 | 1.06 - 1.75   | 0.015   |

OR; odds-ratio, CI; confidence intervall

## Stepwise multivariable modelling

|                                                            | Block 1 |        |        |        |        | Block 2 |        |        |        |         |         |         |         |         |         |         |         |         |         |
|------------------------------------------------------------|---------|--------|--------|--------|--------|---------|--------|--------|--------|---------|---------|---------|---------|---------|---------|---------|---------|---------|---------|
|                                                            | Step 1  | Step 2 | Step 3 | Step 4 | Step 5 | Step 6  | Step 7 | Step 8 | Step 9 | Step 10 | Step 11 | Step 12 | Step 13 | Step 14 | Step 15 | Step 16 | Step 17 | Step 18 | Step 19 |
| SAPS 3                                                     | <0.001  | <0.001 | <0.001 | <0.001 | <0.001 | <0.001  | <0.001 | <0.001 | <0.001 | <0.001  | <0.001  | <0.001  | <0.001  | <0.001  | <0.001  | <0.001  | <0.001  | <0.001  | <0.001  |
| Age                                                        | <0.001  | <0.001 | <0.001 | <0.001 | <0.001 | <0.001  | <0.001 | <0.001 | <0.001 | <0.001  | <0.001  | <0.001  | <0.001  | <0.001  | <0.001  | <0.001  | <0.001  | <0.001  | <0.001  |
| Acute surgery                                              | <0.001  | <0.001 | <0.001 | <0.001 | <0.001 | <0.001  | <0.001 | <0.001 | <0.001 | 0.002   | 0.004   | 0.004   | 0.005   | 0.005   | 0.003   | 0.002   | 0.001   | 0.001   | 0.001   |
| Mean NEMS-score                                            | <0.001  | 0.018  | 0.006  | 0.040  | 0.040  | 0.040   | 0.009  | 0.003  | 0.011  | 0.006   | 0.004   | 0.004   | 0.004   | 0.003   | 0.002   | 0.003   | 0.002   | 0.003   | 0.004   |
| Elective surgery                                           | <0.001  | 0.117  | 0.511  | 0.544  | 0.620  |         |        |        |        |         |         |         |         |         |         |         |         |         |         |
| Sex                                                        | 0.391   | 0.760  | 0.383  | 0.318  | 0.312  |         |        |        |        |         |         |         |         |         |         |         |         |         |         |
| Cardiac arrest and asfyxia                                 | <0.001  | <0.001 | <0.001 | <0.001 | <0.001 | <0.001  | <0.001 | <0.001 | <0.001 | <0.001  | <0.001  | <0.001  | <0.001  | <0.001  | <0.001  | <0.001  | <0.001  | <0.001  | <0.001  |
| Cerebrovascular event, except SAH                          | <0.001  | <0.001 | <0.001 | <0.001 | <0.001 | <0.001  | <0.001 | <0.001 | <0.001 | <0.001  | <0.001  | <0.001  | <0.001  | <0.001  | <0.001  | <0.001  | <0.001  | <0.001  | <0.001  |
| Intoxication                                               | <0.001  | <0.001 | <0.001 | <0.001 | <0.001 | <0.001  | <0.001 | <0.001 | <0.001 | <0.001  | <0.001  | <0.001  | <0.001  | <0.001  | <0.001  | <0.001  | <0.001  | <0.001  | <0.001  |
| Transplantation                                            | <0.001  | <0.001 | <0.001 | <0.001 | <0.001 | <0.001  | <0.001 | <0.001 | <0.001 | <0.001  | <0.001  | <0.001  | <0.001  | <0.001  | <0.001  | <0.001  | <0.001  | <0.001  | <0.001  |
| Traumatic brain injury                                     | 0.003   | <0.001 | <0.001 | <0.001 | <0.001 | <0.001  | <0.001 | <0.001 | <0.001 | <0.001  | <0.001  | <0.001  | <0.001  | <0.001  | <0.001  | <0.001  | <0.001  | <0.001  | <0.001  |
| COPD/asthma                                                | 0.047   | <0.001 | <0.001 | <0.001 | 0.001  | <0.001  | <0.001 | <0.001 | <0.001 | <0.001  | <0.001  | <0.001  | <0.001  | <0.001  | <0.001  | <0.001  | <0.001  | <0.001  | <0.001  |
| Cardiac disease, except cardiac arrest                     | 0.091   | 0.008  | 0.002  | 0.003  | 0.007  | 0.004   | 0.001  | 0.001  | 0.001  | 0.001   | 0.001   | 0.001   | <0.001  | 0.001   | <0.001  | <0.001  | <0.001  | <0.001  | <0.001  |
| Subarachnoid hemorrhage                                    | 0.033   | 0.014  | 0.009  | 0.013  | 0.017  | 0.014   | 0.008  | 0.004  | 0.004  | 0.004   | 0.004   | 0.004   | 0.004   | 0.004   | 0.004   | 0.004   | 0.004   | 0.004   | 0.002   |
| Pancreatitis/cholangitis                                   | <0.001  | 0.001  | 0.002  | 0.002  | 0.001  | 0.001   | 0.003  | 0.005  | 0.005  | 0.005   | 0.005   | 0.005   | 0.005   | 0.005   | 0.005   | 0.007   | 0.009   | 0.013   | 0.013   |
| Acute aortic rupture or dissection                         | 0.105   | 0.043  | 0.022  | 0.024  | 0.048  | 0.037   | 0.018  | 0.009  | 0.007  | 0.010   | 0.010   | 0.010   | 0.010   | 0.010   | 0.010   | 0.010   | 0.006   | 0.004   | 0.002   |
| Gastrointestinal bleeding                                  | 0.52    | 0.155  | 0.075  | 0.105  | 0.187  | 0.137   | 0.063  | 0.031  | 0.026  | 0.034   | 0.022   | 0.022   | 0.022   | 0.022   | 0.022   | 0.022   | 0.013   | 0.007   | 0.007   |
| Acute abdomen, except gastrointestinal bleeding            | 0.43    | 0.145  | 0.075  | 0.087  | 0.174  | 0.134   | 0.065  | 0.033  | 0.028  | 0.037   | 0.023   | 0.014   | 0.014   | 0.014   | 0.014   | 0.014   | 0.014   | 0.007   | 0.007   |
| Respiratory tract infection                                | 0.949   | 0.354  | 0.192  | 0.285  | 0.407  | 0.299   | 0.129  | 0.063  | 0.049  | 0.07    | 0.048   | 0.028   | 0.015   | 0.015   | 0.015   | 0.015   | 0.015   | 0.015   | 0.015   |
| Neurological disease                                       | <0.001  | 0.002  | 0.007  | 0.003  | 0.002  | 0.003   | 0.009  | 0.019  | 0.024  | 0.018   | 0.024   | 0.018   | 0.024   | 0.018   | 0.024   | 0.036   | 0.054   | 0.096   | 0.096   |
| Other                                                      | 0.725   | 0.536  | 0.471  | 0.509  | 0.54   | 0.503   | 0.42   | 0.366  | 0.351  | 0.374   | 0.349   | 0.321   | 0.291   | 0.248   | 0.248   | 0.248   | 0.248   | 0.248   | 0.248   |
| Hematological disease                                      | 0.781   | 0.521  | 0.45   | 0.521  | 0.569  | 0.52    | 0.437  | 0.387  | 0.37   | 0.393   | 0.376   | 0.346   | 0.319   | 0.275   | 0.275   | 0.275   | 0.275   | 0.275   | 0.275   |
| Infection/sepsis, except respiratory tract infection       | 0.001   | 0.08   | 0.235  | 0.141  | 0.064  | 0.121   | 0.391  | 0.731  | 0.841  | 0.647   | 0.824   | 0.923   | 0.644   | 0.304   | 0.304   | 0.304   | 0.304   | 0.304   | 0.304   |
| Liver failure                                              | 0.004   | 0.071  | 0.136  | 0.08   | 0.03   | 0.047   | 0.099  | 0.155  | 0.179  | 0.138   | 0.165   | 0.22    | 0.294   | 0.428   | 0.428   | 0.428   | 0.428   | 0.428   | 0.428   |
| Postoperative care, not specified                          | 0.565   | 0.837  | 0.935  | 0.921  | 0.709  | 0.812   | 0.968  | 0.79   | 0.731  | 0.785   | 0.662   | 0.678   | 0.565   | 0.449   | 0.449   | 0.449   | 0.449   | 0.449   | 0.449   |
| Renal/urologic disease                                     | 0.37    | 0.763  | 0.932  | 0.841  | 0.737  | 0.823   | 0.977  | 0.831  | 0.791  | 0.856   | 0.789   | 0.703   | 0.612   | 0.491   | 0.491   | 0.491   | 0.491   | 0.491   | 0.491   |
| Arterial disease, not ruptured aorta                       | 0.071   | 0.113  | 0.174  | 0.158  | 0.096  | 0.114   | 0.173  | 0.242  | 0.263  | 0.238   | 0.305   | 0.373   | 0.472   | 0.581   | 0.581   | 0.581   | 0.581   | 0.581   | 0.581   |
| Circulatory shock, other                                   | 0.06    | 0.168  | 0.24   | 0.194  | 0.146  | 0.177   | 0.257  | 0.331  | 0.356  | 0.321   | 0.363   | 0.422   | 0.492   | 0.597   | 0.597   | 0.597   | 0.597   | 0.597   | 0.597   |
| Endocrinal disease                                         | 0.019   | 0.08   | 0.141  | 0.09   | 0.07   | 0.097   | 0.178  | 0.264  | 0.3    | 0.262   | 0.314   | 0.389   | 0.476   | 0.628   | 0.628   | 0.628   | 0.628   | 0.628   | 0.628   |
| Psychiatric disease                                        | 0.769   | 0.728  | 0.699  | 0.746  | 0.77   | 0.75    | 0.72   | 0.7    | 0.689  | 0.694   | 0.682   | 0.667   | 0.653   | 0.63    | 0.63    | 0.63    | 0.63    | 0.63    | 0.63    |
| Hemorrhage, not specified                                  | 0.887   | 0.937  | 0.854  | 0.929  | 0.993  | 0.96    | 0.875  | 0.814  | 0.791  | 0.814   | 0.78    | 0.737   | 0.693   | 0.634   | 0.634   | 0.634   | 0.634   | 0.634   | 0.634   |
| Respiratory tract disease, except infection or COPD/asthma | 0.475   | 0.687  | 0.826  | 0.758  | 0.664  | 0.727   | 0.881  | 0.994  | 0.957  | 0.998   | 0.924   | 0.843   | 0.752   | 0.643   | 0.643   | 0.643   | 0.643   | 0.643   | 0.643   |
| Trauma, except traumatic brain injury                      | 0.184   | 0.458  | 0.652  | 0.433  | 0.264  | 0.351   | 0.544  | 0.704  | 0.778  | 0.706   | 0.811   | 0.941   | 0.917   | 0.716   | 0.716   | 0.716   | 0.716   | 0.716   | 0.716   |
| Malignancy                                                 | 0.179   | 0.345  | 0.473  | 0.374  | 0.308  | 0.368   | 0.523  | 0.657  | 0.706  | 0.654   | 0.738   | 0.835   | 0.943   | 0.904   | 0.904   | 0.904   | 0.904   | 0.904   | 0.904   |
| Musculoskeletal disease                                    | 0.999   | 0.999  | 0.999  | 0.999  | 0.999  | 0.999   | 0.999  | 0.999  | 0.999  | 0.999   | 0.999   | 0.999   | 0.999   | 0.999   | 0.999   | 0.999   | 0.999   | 0.999   | 0.999   |

The model was built with a step-wise method in two blocks. In the first block, SAPS 3, age, sex, surgical status and NEMS score were included. In the second step, the primary ICD diagnoses were tested. Variables not in the model were tested in the model one at the time. The variable with the lowest p-value at inclusion in the model were included at each step. This was repeated until there were no remaining variables with a p-value <0.05. Yellow fields represents variables in the model at each step. White fields represent variables tested one at the time in the model.

**Case-control matching according to first three letters of ICD-code of primary ICU-diagnosis, age, SAPS 3 score and ICU-stay**

| Category                            | Variable                                                          | Matched cohort<br>(n=500) | Transferred patients<br>(n=500) |
|-------------------------------------|-------------------------------------------------------------------|---------------------------|---------------------------------|
| Demographics                        | Female sex, n (%)                                                 | 178 (36)                  | 187 (37)                        |
|                                     | Age, years                                                        | 67 (52 - 74)              | 67 (52 - 74)                    |
| ICU data                            | SAPS 3 score                                                      | 61 ± 14                   | 62 ± 14                         |
|                                     | ICU days, days                                                    | 5 (3 - 10)                | 3 (1 - 5)***                    |
|                                     | Mean NEMS                                                         | 34 (29 - 39)              | 38 (34 - 43)***                 |
| Surgery                             | No surgery, n (%)                                                 | 335 (67)                  | 346 (69)                        |
|                                     | Acute surgery, n (%)                                              | 113 (23)                  | 122 (24)                        |
|                                     | Elective surgery, n (%)                                           | 52 (10)                   | 32 (6)*                         |
| Primary ICU diagnosis in categories | Infection/sepsis, except respiratory tract infection, n (%)       | 79 (16)                   | 83 (17)                         |
|                                     | Malignancy, n (%)                                                 | 0 (0)                     | 0 (0)                           |
|                                     | Haematological disease, n (%)                                     | 0 (0)                     | 0 (0)                           |
|                                     | Endocrinal disease, n (%)                                         | 14 (3)                    | 14 (3)                          |
|                                     | Intoxication, n (%)                                               | 14 (3)                    | 14 (3)                          |
|                                     | Neurological disease, n (%)                                       | 13 (3)                    | 13 (3)                          |
|                                     | Cardiac disease, except cardiac arrest, n (%)                     | 18 (4)                    | 18 (4)                          |
|                                     | Cardiac arrest and asphyxia, n (%)                                | 69 (14)                   | 69 (14)                         |
|                                     | Subarachnoid haemorrhage, n (%)                                   | 0 (0)                     | 0 (0)                           |
|                                     | Cerebrovascular event, except SAH, n (%)                          | 6 (1)                     | 6 (1)                           |
|                                     | Acute aortic rupture or dissection, n (%)                         | 4 (1)                     | 4 (1)                           |
|                                     | Arterial disease, not ruptured aorta, n (%)                       | 2 (0)                     | 2 (0)                           |
|                                     | Musculoskeletal disease, n (%)                                    | 0 (0)                     | 0 (0)                           |
|                                     | Circulatory shock, other, n (%)                                   | 9 (2)                     | 3 (1)                           |
|                                     | Respiratory tract infection, n (%)                                | 54 (11)                   | 54 (11)                         |
|                                     | COPD/asthma, n (%)                                                | 66 (13)                   | 66 (13)                         |
|                                     | Respiratory tract disease, except infection or COPD/asthma, n (%) | 3 (1)                     | 3 (1)                           |
|                                     | Renal/urologic disease, n (%)                                     | 11 (2)                    | 11 (2)                          |
|                                     | Acute abdomen, except gastrointestinal bleeding, n (%)            | 22 (4)                    | 22 (4)                          |
|                                     | Gastrointestinal bleeding, n (%)                                  | 15 (3)                    | 15 (3)                          |
|                                     | Liver failure, n (%)                                              | 4 (1)                     | 4 (1)                           |
|                                     | Pancreatitis/cholangitis, n (%)                                   | 9 (2)                     | 9 (2)                           |
|                                     | Psychiatric disease, n (%)                                        | 0 (0)                     | 0 (0)                           |
|                                     | Haemorrhage, other, n (%)                                         | 0 (0)                     | 0 (0)                           |
|                                     | Trauma, except traumatic brain injury, n (%)                      | 67 (13)                   | 67 (13)                         |
|                                     | Traumatic brain injury, n (%)                                     | 4 (1)                     | 6 (1)                           |
|                                     | Surgical and medical complications, n (%)                         | 0 (0)                     | 0 (0)                           |
|                                     | Transplantation, n (%)                                            | 12 (2)                    | 12 (2)                          |
|                                     | Other, n (%)                                                      | 0 (0)                     | 0 (0)                           |
|                                     | Postoperative care, not specified, n (%)                          | 5 (1)                     | 5 (1)                           |

\* p<0.05, \*\* p<0.01, \*\*\* p<0.001

### Case-control matching according to SOFA-score, age and ICU-diagnosis in categories

| Category                            | Variable                                                          | Matched controls (n=202) | Transferred patients (n=202) |
|-------------------------------------|-------------------------------------------------------------------|--------------------------|------------------------------|
| Demographics                        | Female sex, n (%)                                                 | 74 (37)                  | 82 (41)                      |
|                                     | Age, years                                                        | 66 (52 - 76)             | 65 (49 - 74)                 |
| ICU data                            | SAPS 3 score                                                      | 63 ± 15                  | 63 ± 14                      |
|                                     | ICU days, days                                                    | 4 (3 - 9)                | 3 (2 - 4)***                 |
|                                     | Mean NEMS                                                         | 37 (33 - 40)             | 44 (37 - 58)***              |
| Surgery                             | No surgery, n (%)                                                 | 133 (66)                 | 161 (80)**                   |
|                                     | Acute surgery, n (%)                                              | 61 (30)                  | 38 (19)**                    |
|                                     | Elective surgery, n (%)                                           | 8 (4)                    | 3 (1)                        |
| Primary ICU diagnosis in categories | Infection/sepsis, except respiratory tract infection, n (%)       | 45 (22)                  | 45 (22)                      |
|                                     | Malignancy, n (%)                                                 | 0 (0)                    | 0 (0)                        |
|                                     | Haematological disease, n (%)                                     | 0 (0)                    | 0 (0)                        |
|                                     | Endocrinal disease, n (%)                                         | 5 (2)                    | 5 (2)                        |
|                                     | Intoxication, n (%)                                               | 6 (3)                    | 6 (3)                        |
|                                     | Neurological disease, n (%)                                       | 11 (5)                   | 11 (5)                       |
|                                     | Cardiac disease, except cardiac arrest, n (%)                     | 5 (2)                    | 5 (2)                        |
|                                     | Cardiac arrest and asphyxia, n (%)                                | 27 (13)                  | 27 (13)                      |
|                                     | Subarachnoid haemorrhage, n (%)                                   | 0 (0)                    | 0 (0)                        |
|                                     | Cerebrovascular event, except SAH, n (%)                          | 2 (1)                    | 2 (1)                        |
|                                     | Acute aortic rupture or dissection, n (%)                         | 0 (0)                    | 0 (0)                        |
|                                     | Arterial disease, not ruptured aorta, n (%)                       | 0 (0)                    | 0 (0)                        |
|                                     | Musculoskeletal disease, n (%)                                    | 0 (0)                    | 0 (0)                        |
|                                     | Circulatory shock, other, n (%)                                   | 1 (0)                    | 1 (0)                        |
|                                     | Respiratory tract infection, n (%)                                | 28 (14)                  | 28 (14)                      |
|                                     | COPD/asthma, n (%)                                                | 23 (11)                  | 23 (11)                      |
|                                     | Respiratory tract disease, except infection or COPD/asthma, n (%) | 1 (0)                    | 1 (0)                        |
|                                     | Renal/urologic disease, n (%)                                     | 6 (3)                    | 6 (3)                        |
|                                     | Acute abdomen, except gastrointestinal bleeding, n (%)            | 7 (3)                    | 7 (3)                        |
|                                     | Gastrointestinal bleeding, n (%)                                  | 3 (1)                    | 3 (1)                        |
|                                     | Liver failure, n (%)                                              | 1 (0)                    | 1 (0)                        |
|                                     | Pancreatitis/cholangitis, n (%)                                   | 2 (1)                    | 2 (1)                        |
|                                     | Psychiatric disease, n (%)                                        | 0 (0)                    | 0 (0)                        |
|                                     | Haemorrhage, other, n (%)                                         | 0 (0)                    | 0 (0)                        |
|                                     | Trauma, except traumatic brain injury, n (%)                      | 20 (10)                  | 20 (10)                      |
|                                     | Traumatic brain injury, n (%)                                     | 5 (2)                    | 5 (2)                        |
|                                     | Surgical and medical complications, n (%)                         | 3 (1)                    | 3 (1)                        |
|                                     | Transplantation, n (%)                                            | 0 (0)                    | 0 (0)                        |
|                                     | Other, n (%)                                                      | 0 (0)                    | 0 (0)                        |
|                                     | Postoperative care, not specified, n (%)                          | 1 (0)                    | 1 (0)                        |

\* p<0.05, \*\* p<0.01, \*\*\* p<0.001

## Propensity score matched case/controls

| Category              | Variable                                                          | Matched cohort<br>(n=573) | Transferred patients<br>(n=573) |
|-----------------------|-------------------------------------------------------------------|---------------------------|---------------------------------|
| Demographics          | Female sex, n (%)                                                 | 231 (40)                  | 224 (39)                        |
|                       | Age, years                                                        | 66 (52 - 74)              | 66 (50 - 74)                    |
| ICU data              | SAPS 3 score                                                      | 63 ± 16                   | 62 ± 15                         |
|                       | ICU days, days                                                    | 2 (1 - 5)                 | 3 (2 - 5)                       |
|                       | Mean NEMS                                                         | 36 (31 - 44)              | 38 (34 - 43)**                  |
| Surgery               | No surgery, n (%)                                                 | 353 (62)                  | 399 (70)                        |
|                       | Acute surgery, n (%)                                              | 158 (28)                  | 138 (24)                        |
|                       | Elective surgery, n (%)                                           | 62 (11)                   | 36 (6)**                        |
| Primary ICU diagnosis | Infection/sepsis, except respiratory tract infection, n (%)       | 64 (11)                   | 97 (17)**                       |
|                       | Malignancy, n (%)                                                 | 21 (4)                    | 0 (0)***                        |
|                       | Haematological disease, n (%)                                     | 3 (1)                     | 0 (0)                           |
|                       | Endocrinal disease, n (%)                                         | 21 (4)                    | 16 (3)                          |
|                       | Intoxication, n (%)                                               | 14 (2)                    | 24 (4)                          |
|                       | Neurological disease, n (%)                                       | 22 (4)                    | 20 (3)                          |
|                       | Cardiac disease, except cardiac arrest, n (%)                     | 37 (6)                    | 19 (3)*                         |
|                       | Cardiac arrest and asphyxia, n (%)                                | 72 (13)                   | 70 (12)                         |
|                       | Subarachnoid haemorrhage, n (%)                                   | 4 (1)                     | 0 (0)                           |
|                       | Cerebrovascular event, except SAH, n (%)                          | 20 (3)                    | 7 *                             |
|                       | Acute aortic rupture or dissection, n (%)                         | 9 (2)                     | 5 (1)                           |
|                       | Arterial disease, not ruptured aorta, n (%)                       | 11 (2)                    | 2 (0)*                          |
|                       | Musculoskeletal disease, n (%)                                    | 0 (0)                     | 0 (0)                           |
|                       | Circulatory shock, other, n (%)                                   | 6 (1)                     | 3 (1)                           |
|                       | Respiratory tract infection, n (%)                                | 24 (4)                    | 69 (12)***                      |
|                       | COPD/asthma, n (%)                                                | 54 (9)                    | 67 (12)                         |
|                       | Respiratory tract disease, except infection or COPD/asthma, n (%) | 7 (1)                     | 6 (1)                           |
|                       | Renal/urologic disease, n (%)                                     | 6 (1)                     | 15 (3)                          |
|                       | Acute abdomen, except gastrointestinal bleeding, n (%)            | 16 (3)                    | 25 (4)                          |
|                       | Gastrointestinal bleeding, n (%)                                  | 18 (3)                    | 16 (3)                          |
|                       | Liver failure, n (%)                                              | 29 (5)                    | 5 (1)***                        |
|                       | Pancreatitis/cholangitis, n (%)                                   | 10 (2)                    | 10 (2)                          |
|                       | Psychiatric disease, n (%)                                        | 0 (0)                     | 0 (0)                           |
|                       | Haemorrhage, other, n (%)                                         | 2 (0)                     | 0 (0)                           |
|                       | Trauma, except traumatic brain injury, n (%)                      | 37 (6)                    | 73 (13)***                      |
|                       | Traumatic brain injury, n (%)                                     | 24 (4)                    | 12 (2)                          |
|                       | Surgical and medical complications, n (%)                         | 16 (3)                    | 7 (1)                           |
|                       | Transplantation, n (%)                                            | 19 (3)                    | 0 (0)***                        |
|                       | Other, n (%)                                                      | 4 (1)                     | 0 (0)                           |
|                       | Postoperative care, not specified, n (%)                          | 3 (1)                     | 5 (1)                           |

\* p<0.05, \*\* p<0.01, \*\*\* p<0.001

## Primary ICD-codes and the corresponding ICU-diagnosis

| ICD-code | ICU-diagnosis                                   | Number of patients |                                         | ICD-text                                                     |
|----------|-------------------------------------------------|--------------------|-----------------------------------------|--------------------------------------------------------------|
|          |                                                 | No transfer        | Transferred due to shortage of ICU beds |                                                              |
| K209     | Acute abdomen, except gastrointestinal bleeding | 1                  | 0                                       | Esophagitis, unspecified                                     |
| K223     | Acute abdomen, except gastrointestinal bleeding | 18                 | 1                                       | Perforation of esophagus                                     |
| K238     | Acute abdomen, except gastrointestinal bleeding | 1                  | 0                                       | Disorders of esophagus in diseases classified elsewhere      |
| K250     | Acute abdomen, except gastrointestinal bleeding | 10                 | 2                                       | Acute gastric ulcer with hemorrhage                          |
| K251     | Acute abdomen, except gastrointestinal bleeding | 18                 | 2                                       | Acute gastric ulcer with perforation                         |
| K260     | Acute abdomen, except gastrointestinal bleeding | 0                  | 0                                       | Acute duodenal ulcer with hemorrhage                         |
| K261     | Acute abdomen, except gastrointestinal bleeding | 1                  | 0                                       | Acute duodenal ulcer with perforation                        |
| K270     | Acute abdomen, except gastrointestinal bleeding | 1                  | 0                                       | Acute peptic ulcer, site unspecified, with hemorrhage        |
| K271     | Acute abdomen, except gastrointestinal bleeding | 0                  | 0                                       | Acute peptic ulcer, site unspecified, with perforation       |
| K279     | Acute abdomen, except gastrointestinal bleeding | 17                 | 2                                       | Peptic ulc, site unsp, unsp as ac or chr, w/o hemor or perf  |
| K352     | Acute abdomen, except gastrointestinal bleeding | 1                  | 0                                       | Acute appendicitis with generalized peritonitis              |
| K403     | Acute abdomen, except gastrointestinal bleeding | 1                  | 0                                       | Unilateral inguinal hernia, with obstruction, w/o gangrene   |
| K430     | Acute abdomen, except gastrointestinal bleeding | 1                  | 0                                       | Incisional hernia with obstruction, without gangrene         |
| K460     | Acute abdomen, except gastrointestinal bleeding | 2                  | 0                                       | Unsp abdominal hernia with obstruction, without gangrene     |
| K461     | Acute abdomen, except gastrointestinal bleeding | 1                  | 0                                       | Unspecified abdominal hernia with gangrene                   |
| K519     | Acute abdomen, except gastrointestinal bleeding | 1                  | 0                                       | Ulcerative colitis, unspecified                              |
| K529     | Acute abdomen, except gastrointestinal bleeding | 3                  | 0                                       | Noninfective gastroenteritis and colitis, unspecified        |
| K550     | Acute abdomen, except gastrointestinal bleeding | 30                 | 2                                       | Acute vascular disorders of intestine                        |
| K563     | Acute abdomen, except gastrointestinal bleeding | 1                  | 0                                       | Gallstone ileus                                              |
| K565     | Acute abdomen, except gastrointestinal bleeding | 2                  | 0                                       | Intestinal adhesions w obst (postprocedural) (postinfection) |
| K567     | Acute abdomen, except gastrointestinal bleeding | 46                 | 6                                       | Ileus, unspecified                                           |
| K570     | Acute abdomen, except gastrointestinal bleeding | 1                  | 0                                       | Diverticulitis of small intestine w perforation and abscess  |
| K590     | Acute abdomen, except gastrointestinal bleeding | 1                  | 0                                       | Constipation                                                 |
| K630     | Acute abdomen, except gastrointestinal bleeding | 1                  | 0                                       | Abscess of intestine                                         |
| K631     | Acute abdomen, except gastrointestinal bleeding | 37                 | 8                                       | Perforation of intestine (nontraumatic)                      |
| K650     | Acute abdomen, except gastrointestinal bleeding | 21                 | 2                                       | Generalized (acute) peritonitis                              |
| K919     | Acute abdomen, except gastrointestinal bleeding | 1                  | 0                                       | Oth postprocedural complications and disorders of dgstv sys  |
| K928     | Acute abdomen, except gastrointestinal bleeding | 1                  | 0                                       | Other specified diseases of the digestive system             |
| R104     | Acute abdomen, except gastrointestinal bleeding | 4                  | 0                                       | Periumbilical pain                                           |
| R198     | Acute abdomen, except gastrointestinal bleeding | 1                  | 0                                       | Oth symptoms and signs involving the dgstv sys and abdomen   |
| I710     | Acute aortic rupture or dissection              | 70                 | 0                                       | Dissection of aorta                                          |
| I711     | Acute aortic rupture or dissection              | 1                  | 0                                       | Thoracic aortic aneurysm, ruptured                           |
| I713     | Acute aortic rupture or dissection              | 10                 | 0                                       | Abdominal aortic aneurysm, ruptured                          |

|      |                                        |     |                                                                |
|------|----------------------------------------|-----|----------------------------------------------------------------|
| I718 | Acute aortic rupture or dissection     | 101 | 5 Aortic aneurysm of unspecified site, ruptured                |
| I702 | Arterial disease, not ruptured aorta   | 1   | 0 Atherosclerosis of native arteries of the extremities        |
| I708 | Arterial disease, not ruptured aorta   | 2   | 0 Atherosclerosis of other arteries                            |
| I709 | Arterial disease, not ruptured aorta   | 2   | 0 Other and unspecified atherosclerosis                        |
| I712 | Arterial disease, not ruptured aorta   | 1   | 0 Thoracic aortic aneurysm, without rupture                    |
| I714 | Arterial disease, not ruptured aorta   | 5   | 0 Abdominal aortic aneurysm, without rupture                   |
| I716 | Arterial disease, not ruptured aorta   | 0   | 0 Thoracoabdominal aortic aneurysm, without rupture            |
| I719 | Arterial disease, not ruptured aorta   | 45  | 1 Aortic aneurysm of unspecified site, without rupture         |
| I724 | Arterial disease, not ruptured aorta   | 1   | 0 Aneurysm of artery of lower extremity                        |
| I729 | Arterial disease, not ruptured aorta   | 1   | 0 Aneurysm of unspecified site                                 |
| I739 | Arterial disease, not ruptured aorta   | 36  | 0 Peripheral vascular disease, unspecified                     |
| I740 | Arterial disease, not ruptured aorta   | 2   | 0 Embolism and thrombosis of abdominal aorta                   |
| I742 | Arterial disease, not ruptured aorta   | 2   | 0 Embolism and thrombosis of arteries of the upper extremities |
| I743 | Arterial disease, not ruptured aorta   | 11  | 1 Embolism and thrombosis of arteries of the lower extremities |
| I745 | Arterial disease, not ruptured aorta   | 1   | 0 Embolism and thrombosis of iliac artery                      |
| I748 | Arterial disease, not ruptured aorta   | 1   | 0 Embolism and thrombosis of other arteries                    |
| I749 | Arterial disease, not ruptured aorta   | 131 | 0 Embolism and thrombosis of unspecified artery                |
| I779 | Arterial disease, not ruptured aorta   | 0   | 0 Disorder of arteries and arterioles, unspecified             |
| I798 | Arterial disease, not ruptured aorta   | 1   | 0 Oth disord of art,arterioles & capilare in dis classd elswhr |
| I829 | Arterial disease, not ruptured aorta   | 8   | 0 Chronic embolism and thrombosis of deep vn unsp up extrem    |
| I469 | Cardiac arrest and asfyxia             | 635 | 70 Cardiac arrest, cause unspecified                           |
| P284 | Cardiac arrest and asfyxia             | 1   | 0 Other apnea of newborn                                       |
| R090 | Cardiac arrest and asfyxia             | 3   | 0 Asphyxia and hypoxemia                                       |
| R092 | Cardiac arrest and asfyxia             | 4   | 0 Respiratory arrest                                           |
| T719 | Cardiac arrest and asfyxia             | 4   | 0 Asphyxiation due to unspecified cause                        |
| T751 | Cardiac arrest and asfyxia             | 8   | 0 Unspecified effects of drowning and nonfatal submersion      |
| G931 | Cardiac disease, except cardiac arrest | 7   | 0 Anoxic brain damage, not elsewhere classified                |
| I109 | Cardiac disease, except cardiac arrest | 8   | 0 Essential (primary) hypertension                             |
| I110 | Cardiac disease, except cardiac arrest | 1   | 0 Hypertensive heart disease with heart failure                |
| I152 | Cardiac disease, except cardiac arrest | 1   | 0 Hypertension secondary to endocrine disorders                |
| I212 | Cardiac disease, except cardiac arrest | 1   | 0 ST elevation (STEMI) myocardial infarction of other sites    |
| I214 | Cardiac disease, except cardiac arrest | 0   | 0 Non-ST elevation (NSTEMI) myocardial infarction              |
| I219 | Cardiac disease, except cardiac arrest | 45  | 7 Non-ST elevation (NSTEMI) myocardial infarction              |
| I238 | Cardiac disease, except cardiac arrest | 1   | 0 Oth current complications following AMI                      |
| I241 | Cardiac disease, except cardiac arrest | 4   | 1 Dressler's syndrome                                          |
| I249 | Cardiac disease, except cardiac arrest | 2   | 0 Acute ischemic heart disease, unspecified                    |
| I259 | Cardiac disease, except cardiac arrest | 1   | 0 Chronic ischemic heart disease, unspecified                  |
| I260 | Cardiac disease, except cardiac arrest | 8   | 0 Pulmonary embolism with acute cor pulmonale                  |
| I269 | Cardiac disease, except cardiac arrest | 82  | 2 Pulmonary embolism without acute cor pulmonale               |
| I270 | Cardiac disease, except cardiac arrest | 2   | 0 Primary pulmonary hypertension                               |

|      |                                        |    |                                                                 |
|------|----------------------------------------|----|-----------------------------------------------------------------|
| I309 | Cardiac disease, except cardiac arrest | 1  | 0 Acute pericarditis, unspecified                               |
| I319 | Cardiac disease, except cardiac arrest | 6  | 0 Disease of pericardium, unspecified                           |
| I330 | Cardiac disease, except cardiac arrest | 1  | 0 Acute and subacute infective endocarditis                     |
| I340 | Cardiac disease, except cardiac arrest | 3  | 0 Nonrheumatic mitral (valve) insufficiency                     |
| I350 | Cardiac disease, except cardiac arrest | 5  | 0 Nonrheumatic aortic (valve) stenosis                          |
| I389 | Cardiac disease, except cardiac arrest | 0  | 0 Endocarditis, valve unspecified                               |
| I421 | Cardiac disease, except cardiac arrest | 1  | 0 Obstructive hypertrophic cardiomyopathy                       |
| I429 | Cardiac disease, except cardiac arrest | 3  | 0 Cardiomyopathy, unspecified                                   |
| I442 | Cardiac disease, except cardiac arrest | 5  | 0 Atrioventricular block, complete                              |
| I455 | Cardiac disease, except cardiac arrest | 1  | 0 Other specified heart block                                   |
| I459 | Cardiac disease, except cardiac arrest | 2  | 0 Conduction disorder, unspecified                              |
| I489 | Cardiac disease, except cardiac arrest | 20 | 0 Unspecified atrial fibrillation and atrial flutter            |
| I490 | Cardiac disease, except cardiac arrest | 2  | 0 Ventricular fibrillation and flutter                          |
| I495 | Cardiac disease, except cardiac arrest | 1  | 0 Sick sinus syndrome                                           |
| I499 | Cardiac disease, except cardiac arrest | 6  | 0 Cardiac arrhythmia, unspecified                               |
| I500 | Cardiac disease, except cardiac arrest | 4  | 0 Heart failure                                                 |
| I501 | Cardiac disease, except cardiac arrest | 59 | 5 Left ventricular failure                                      |
| I509 | Cardiac disease, except cardiac arrest | 65 | 4 Heart failure, unspecified                                    |
| I519 | Cardiac disease, except cardiac arrest | 3  | 0 Heart disease, unspecified                                    |
| R001 | Cardiac disease, except cardiac arrest | 4  | 0 Bradycardia, unspecified                                      |
| R570 | Cardiac disease, except cardiac arrest | 33 | 0 Cardiogenic shock                                             |
| Z034 | Cardiac disease, except cardiac arrest | 2  | 0 Encntr for medical obs for susp diseases and cond ruled out   |
| I610 | Cerebrovascular event, except SAH      | 1  | 1 Nontraumatic intrcbl hemorrhage in hemisphere, subcortical    |
| I611 | Cerebrovascular event, except SAH      | 1  | 0 Nontraumatic intrcbl hemorrhage in hemisphere, cortical       |
| I612 | Cerebrovascular event, except SAH      | 45 | 2 Nontraumatic intracerebral hemorrhage in hemisphere, unsp     |
| I613 | Cerebrovascular event, except SAH      | 9  | 0 Nontraumatic intracerebral hemorrhage in brain stem           |
| I614 | Cerebrovascular event, except SAH      | 5  | 1 Nontraumatic intracerebral hemorrhage in cerebellum           |
| I619 | Cerebrovascular event, except SAH      | 7  | 0 Nontraumatic intracerebral hemorrhage, unspecified            |
| I620 | Cerebrovascular event, except SAH      | 14 | 1 Nontraumatic subdural hemorrhage                              |
| I629 | Cerebrovascular event, except SAH      | 40 | 0 Nontraumatic intracranial hemorrhage, unspecified             |
| I630 | Cerebrovascular event, except SAH      | 2  | 0 Cerebral infarction due to thrombosis of precerebr arteries   |
| I633 | Cerebrovascular event, except SAH      | 4  | 0 Cerebral infarction due to thrombosis of cerebral arteries    |
| I634 | Cerebrovascular event, except SAH      | 1  | 0 Cerebral infarction due to embolism of cerebral arteries      |
| I635 | Cerebrovascular event, except SAH      | 1  | 0 Cerebral infrc due to unsp occls or stenosis of cerebral art  |
| I636 | Cerebrovascular event, except SAH      | 11 | 0 Cerebral infrc due to cerebral venous thrombosis, nonpyogenic |
| I638 | Cerebrovascular event, except SAH      | 4  | 0 Other cerebral infarction                                     |
| I639 | Cerebrovascular event, except SAH      | 69 | 1 Cerebral infarction, unspecified                              |
| I652 | Cerebrovascular event, except SAH      | 4  | 0 Occlusion and stenosis of carotid artery                      |
| I669 | Cerebrovascular event, except SAH      | 7  | 0 Occlusion and stenosis of unspecified cerebral artery         |
| I679 | Cerebrovascular event, except SAH      | 6  | 0 Cerebrovascular disease, unspecified                          |



|      |                                   |     |                                                                |
|------|-----------------------------------|-----|----------------------------------------------------------------|
| I691 | Cerebrovascular event, except SAH | 0   | 0 Sequelae of nontraumatic intracerebral hemorrhage            |
| I693 | Cerebrovascular event, except SAH | 0   | 1 Sequelae of cerebral infarction                              |
| I952 | Circulatory shock, not specified  | 1   | 0 Hypotension due to drugs                                     |
| I958 | Circulatory shock, not specified  | 4   | 0 Other hypotension                                            |
| I959 | Circulatory shock, not specified  | 7   | 0 Hypotension, unspecified                                     |
| R571 | Circulatory shock, not specified  | 61  | 3 Hypovolemic shock                                            |
| R578 | Circulatory shock, not specified  | 2   | 0 Other shock                                                  |
| R579 | Circulatory shock, not specified  | 2   | 0 Shock, unspecified                                           |
| T782 | Circulatory shock, not specified  | 30  | 0 Anaphylactic shock, unspecified                              |
| T783 | Circulatory shock, not specified  | 1   | 0 Angioneurotic edema                                          |
| T784 | Circulatory shock, not specified  | 11  | 0 Other and unspecified allergy                                |
| T811 | Circulatory shock, not specified  | 13  | 0 Postprocedural shock                                         |
| J440 | COPD/asthma                       | 2   | 0 Chronic obstructive pulmon disease w acute lower resp infct  |
| J441 | COPD/asthma                       | 7   | 1 Chronic obstructive pulmonary disease w (acute) exacerbation |
| J448 | COPD/asthma                       | 1   | 0 Chronic obstructive pulmonary disease w (acute) exacerbation |
| J449 | COPD/asthma                       | 73  | 7 Chronic obstructive pulmonary disease, unspecified           |
| J469 | COPD/asthma                       | 14  | 1 Other asthma                                                 |
| J809 | COPD/asthma                       | 36  | 5 Acute respiratory distress syndrome                          |
| J819 | COPD/asthma                       | 49  | 5 Chronic pulmonary edema                                      |
| J841 | COPD/asthma                       | 15  | 0 Other interstitial pulmonary diseases with fibrosis          |
| J939 | COPD/asthma                       | 21  | 0 Pneumothorax, unspecified                                    |
| J942 | COPD/asthma                       | 1   | 0 Hemothorax                                                   |
| J948 | COPD/asthma                       | 2   | 0 Other specified pleural conditions                           |
| J951 | COPD/asthma                       | 4   | 0 Acute pulmonary insufficiency following thoracic surgery     |
| J952 | COPD/asthma                       | 37  | 2 Acute pulmonary insufficiency following nonthoracic surgery  |
| J960 | COPD/asthma                       | 16  | 1 Acute respiratory failure                                    |
| J961 | COPD/asthma                       | 1   | 0 Chronic respiratory failure                                  |
| J969 | COPD/asthma                       | 441 | 45 Respiratory failure, unspecified                            |
| J981 | COPD/asthma                       | 8   | 0 Pulmonary collapse                                           |
| J985 | COPD/asthma                       | 2   | 0 Diseases of mediastinum, not elsewhere classified            |
| J988 | COPD/asthma                       | 1   | 0 Other specified respiratory disorders                        |
| J989 | COPD/asthma                       | 2   | 0 Respiratory disorder, unspecified                            |
| E035 | Endocrinal disease                | 0   | 0 Myxedema coma                                                |
| E040 | Endocrinal disease                | 0   | 1 Nontoxic diffuse goiter                                      |
| E055 | Endocrinal disease                | 1   | 0 Thyrotoxicosis factitia with thyrotoxic crisis or storm      |
| E079 | Endocrinal disease                | 1   | 0 Disorder of thyroid, unspecified                             |
| E100 | Endocrinal disease                | 2   | 0 Type 1 diabetes mellitus                                     |
| E101 | Endocrinal disease                | 3   | 0 Type 1 diabetes mellitus with ketoacidosis                   |
| E108 | Endocrinal disease                | 1   | 0 Type 1 diabetes mellitus with unspecified complications      |
| E111 | Endocrinal disease                | 2   | 0 Type 2 diabetes mellitus with hyperosmolarity with coma      |

|       |                           |     |                                                               |
|-------|---------------------------|-----|---------------------------------------------------------------|
| E111A | Endocrinal disease        | 1   | 0 Type 2 diabetes mellitus with hyperosmolarity with coma     |
| E140  | Endocrinal disease        | 15  | 1 Other specified diabetes mellitus without complications     |
| E141  | Endocrinal disease        | 52  | 3 Other specified diabetes mellitus without complications     |
| E142  | Endocrinal disease        | 1   | 0 Other specified diabetes mellitus without complications     |
| E160  | Endocrinal disease        | 1   | 0 Drug-induced hypoglycemia without coma                      |
| E162  | Endocrinal disease        | 1   | 0 Hypoglycemia, unspecified                                   |
| E213  | Endocrinal disease        | 1   | 0 Hyperparathyroidism, unspecified                            |
| E222  | Endocrinal disease        | 2   | 0 Syndrome of inappropriate secretion of antidiuretic hormone |
| E274  | Endocrinal disease        | 2   | 0 Other and unspecified adrenocortical insufficiency          |
| E340  | Endocrinal disease        | 2   | 0 Carcinoid syndrome                                          |
| E662  | Endocrinal disease        | 1   | 0 Morbid (severe) obesity with alveolar hypoventilation       |
| E669  | Endocrinal disease        | 1   | 0 Obesity, unspecified                                        |
| E869  | Endocrinal disease        | 18  | 0 Volume depletion, unspecified                               |
| E870  | Endocrinal disease        | 8   | 1 Hyperosmolality and hypernatremia                           |
| E871  | Endocrinal disease        | 77  | 4 Hypo-osmolality and hyponatremia                            |
| E871B | Endocrinal disease        | 1   | 0 Hypo-osmolality and hyponatremia                            |
| E872  | Endocrinal disease        | 22  | 2 Acidosis                                                    |
| E873  | Endocrinal disease        | 3   | 0 Alkalosis                                                   |
| E875  | Endocrinal disease        | 25  | 1 Hyperkalemia                                                |
| E876  | Endocrinal disease        | 25  | 1 Hypokalemia                                                 |
| E877  | Endocrinal disease        | 2   | 0 Fluid overload                                              |
| E878  | Endocrinal disease        | 17  | 2 Oth disorders of electrolyte and fluid balance, NEC         |
| R739  | Endocrinal disease        | 1   | 0 Hyperglycemia, unspecified                                  |
| K921  | Gastrointestinal bleeding | 1   | 0 Melena                                                      |
| K922  | Gastrointestinal bleeding | 279 | 16 Gastrointestinal hemorrhage, unspecified                   |
| C795  | Hematological disease     | 1   | 0 Malignant neoplasm of endocrine gland, unspecified          |
| C851  | Hematological disease     | 1   | 0 Unspecified B-cell lymphoma                                 |
| C900  | Hematological disease     | 1   | 0 Multiple myeloma                                            |
| C920  | Hematological disease     | 1   | 0 Acute myeloblastic leukemia                                 |
| C969  | Hematological disease     | 15  | 0 Unifocal Langerhans-cell histiocytosis                      |
| D629  | Hematological disease     | 0   | 0 Acute posthemorrhagic anemia                                |
| D689  | Hematological disease     | 2   | 0 Coagulation defect, unspecified                             |
| D693  | Hematological disease     | 0   | 0 Immune thrombocytopenic purpura                             |
| D695  | Hematological disease     | 1   | 0 Secondary thrombocytopenia                                  |
| D709  | Hematological disease     | 1   | 0 Neutropenia, unspecified                                    |
| D709C | Hematological disease     | 1   | 0 Neutropenia, unspecified                                    |
| D759  | Hematological disease     | 10  | 0 Disease of blood and blood-forming organs, unspecified      |
| D849  | Hematological disease     | 1   | 0 Immunodeficiency, unspecified                               |
| N939  | Hemorrhage, not specified | 4   | 0 Abnormal uterine and vaginal bleeding, unspecified          |
| O723  | Hemorrhage, not specified | 2   | 0 Postpartum coagulation defects                              |

|      |                                                      |    |                                                                       |
|------|------------------------------------------------------|----|-----------------------------------------------------------------------|
| R589 | Hemorrhage, not specified                            | 39 | 0 Hemorrhage, not elsewhere classified                                |
| A030 | Infection/sepsis, except respiratory tract infection | 0  | 1 Shigellosis due to <i>Shigella dysenteriae</i>                      |
| A047 | Infection/sepsis, except respiratory tract infection | 1  | 0 Enterocolitis due to <i>Clostridium difficile</i>                   |
| A085 | Infection/sepsis, except respiratory tract infection | 0  | 1 Viral intestinal infection, unspecified                             |
| A099 | Infection/sepsis, except respiratory tract infection | 2  | 0 Infectious gastroenteritis and colitis, unspecified                 |
| A408 | Infection/sepsis, except respiratory tract infection | 1  | 0 Other streptococcal sepsis                                          |
| A410 | Infection/sepsis, except respiratory tract infection | 2  | 0 Sepsis due to <i>Staphylococcus aureus</i>                          |
| A415 | Infection/sepsis, except respiratory tract infection | 2  | 1 Sepsis due to other Gram-negative organisms                         |
| A418 | Infection/sepsis, except respiratory tract infection | 0  | 0 Other specified sepsis                                              |
| A419 | Infection/sepsis, except respiratory tract infection | 13 | 2 Sepsis, unspecified organism                                        |
| A469 | Infection/sepsis, except respiratory tract infection | 1  | 0 Erysipelas                                                          |
| A490 | Infection/sepsis, except respiratory tract infection | 0  | 0 Staphylococcal infection, unspecified site                          |
| A498 | Infection/sepsis, except respiratory tract infection | 2  | 0 Other bacterial infections of unspecified site                      |
| A499 | Infection/sepsis, except respiratory tract infection | 22 | 5 Bacterial infection, unspecified                                    |
| A869 | Infection/sepsis, except respiratory tract infection | 1  | 0 Unspecified viral encephalitis                                      |
| A879 | Infection/sepsis, except respiratory tract infection | 1  | 0 Viral meningitis, unspecified                                       |
| B004 | Infection/sepsis, except respiratory tract infection | 3  | 0 Herpesviral encephalitis                                            |
| B199 | Infection/sepsis, except respiratory tract infection | 1  | 1 Unspecified viral hepatitis without hepatic coma                    |
| B349 | Infection/sepsis, except respiratory tract infection | 1  | 0 Viral infection, unspecified                                        |
| B379 | Infection/sepsis, except respiratory tract infection | 1  | 0 Candidiasis, unspecified                                            |
| B499 | Infection/sepsis, except respiratory tract infection | 1  | 0 Unspecified mycosis                                                 |
| B549 | Infection/sepsis, except respiratory tract infection | 1  | 0 Unspecified malaria                                                 |
| B599 | Infection/sepsis, except respiratory tract infection | 1  | 0 Pneumocystosis                                                      |
| B670 | Infection/sepsis, except respiratory tract infection | 1  | 0 <i>Echinococcus granulosus</i> infection of liver                   |
| B950 | Infection/sepsis, except respiratory tract infection | 0  | 1 <i>Streptococcus</i> , group A, causing diseases classd elswhr      |
| B951 | Infection/sepsis, except respiratory tract infection | 1  | 0 <i>Streptococcus</i> , group B, causing diseases classd elswhr      |
| B953 | Infection/sepsis, except respiratory tract infection | 3  | 0 <i>Streptococcus pneumoniae</i> causing diseases classd elswhr      |
| B955 | Infection/sepsis, except respiratory tract infection | 1  | 0 Unsp streptococcus as the cause of diseases classd elswhr           |
| B956 | Infection/sepsis, except respiratory tract infection | 2  | 0 <i>Staphylococcus aureus</i> as the cause of diseases classd elswhr |
| B962 | Infection/sepsis, except respiratory tract infection | 2  | 0 <i>Escherichia coli</i> as the cause of diseases classd elswhr      |
| B965 | Infection/sepsis, except respiratory tract infection | 2  | 0 <i>Pseudomonas (mallei)</i> causing diseases classd elswhr          |
| B999 | Infection/sepsis, except respiratory tract infection | 15 | 1 Unspecified infectious disease                                      |
| G009 | Infection/sepsis, except respiratory tract infection | 11 | 4 Bacterial meningitis, unspecified                                   |
| G039 | Infection/sepsis, except respiratory tract infection | 2  | 0 Meningitis, unspecified                                             |
| G049 | Infection/sepsis, except respiratory tract infection | 2  | 0 Encephalitis, myelitis and encephalomyelitis, unspecified           |
| G060 | Infection/sepsis, except respiratory tract infection | 1  | 0 Intracranial abscess and granuloma                                  |
| G061 | Infection/sepsis, except respiratory tract infection | 2  | 0 Intraspinal abscess and granuloma                                   |
| L033 | Infection/sepsis, except respiratory tract infection | 1  | 0 Cellulitis and acute lymphangitis of trunk                          |
| L088 | Infection/sepsis, except respiratory tract infection | 2  | 0 Oth local infections of the skin and subcutaneous tissue            |
| L089 | Infection/sepsis, except respiratory tract infection | 5  | 2 Local infection of the skin and subcutaneous tissue, unsp           |

|      |                                                      |     |                                                                |
|------|------------------------------------------------------|-----|----------------------------------------------------------------|
| L979 | Infection/sepsis, except respiratory tract infection | 1   | 0 Non-pressure chronic ulcer of unspecified part of lower leg  |
| M463 | Infection/sepsis, except respiratory tract infection | 1   | 0 Infection of intervertebral disc (pyogenic)                  |
| M726 | Infection/sepsis, except respiratory tract infection | 6   | 7 Necrotizing fasciitis                                        |
| M869 | Infection/sepsis, except respiratory tract infection | 0   | 0 Osteomyelitis, unspecified                                   |
| N390 | Infection/sepsis, except respiratory tract infection | 36  | 4 Urinary tract infection, site not specified                  |
| R572 | Infection/sepsis, except respiratory tract infection | 351 | 50 Hypovolemic shock                                           |
| R651 | Infection/sepsis, except respiratory tract infection | 154 | 16 SIRS of non-infectious origin                               |
| T814 | Infection/sepsis, except respiratory tract infection | 15  | 1 Infection following a procedure                              |
| F100 | Intoxication                                         | 51  | 2 Alcohol related disorders                                    |
| F104 | Intoxication                                         | 3   | 0 Alcohol dependence with unspecified alcohol-induced disorder |
| F110 | Intoxication                                         | 5   | 0 Opioid related disorders                                     |
| F130 | Intoxication                                         | 43  | 2 Sedative, hypnotic, or anxiolytic related disorders          |
| F150 | Intoxication                                         | 1   | 0 Other stimulant related disorders                            |
| F190 | Intoxication                                         | 9   | 1 Other psychoactive substance related disorders               |
| F191 | Intoxication                                         | 1   | 0 Other psychoactive substance abuse                           |
| F199 | Intoxication                                         | 1   | 1 Other psychoactive substance use, unspecified                |
| T391 | Intoxication                                         | 16  | 0 4-Aminophenol derivatives                                    |
| T401 | Intoxication                                         | 7   | 0 Poisoning by and adverse effect of heroin                    |
| T402 | Intoxication                                         | 22  | 0 Poisoning by, adverse effect of and underdosing of opioids   |
| T404 | Intoxication                                         | 1   | 0 Synthetic narcotics                                          |
| T406 | Intoxication                                         | 33  | 0 And unsp narcotics                                           |
| T407 | Intoxication                                         | 3   | 1 Cannabis (derivatives)                                       |
| T409 | Intoxication                                         | 1   | 0 And unsp psychodysleptics                                    |
| T414 | Intoxication                                         | 5   | 0 Unsp anesthetic                                              |
| T423 | Intoxication                                         | 1   | 0 Barbiturates                                                 |
| T424 | Intoxication                                         | 33  | 0 Benzodiazepines                                              |
| T426 | Intoxication                                         | 1   | 0 Antiepileptic and sedative-hypnotic drugs                    |
| T427 | Intoxication                                         | 32  | 2 Unsp antiepileptic and sedative-hypnotic drugs               |
| T430 | Intoxication                                         | 17  | 1 Tricyclic and tetracyclic antidepressants                    |
| T432 | Intoxication                                         | 8   | 2 And unsp antidepressants                                     |
| T434 | Intoxication                                         | 1   | 0 Butyrophenone and thiothixene neuroleptics                   |
| T435 | Intoxication                                         | 12  | 3 And unsp antipsychotics and neuroleptics                     |
| T436 | Intoxication                                         | 12  | 1 Psychostimulants                                             |
| T439 | Intoxication                                         | 8   | 1 Unsp psychotropic drug                                       |
| T460 | Intoxication                                         | 1   | 0 Cardi-stim glycos/drug similar act                           |
| T510 | Intoxication                                         | 1   | 0 Toxic effect of ethanol                                      |
| T511 | Intoxication                                         | 1   | 0 Toxic effect of methanol                                     |
| T512 | Intoxication                                         | 0   | 0 Toxic effect of 2-Propanol                                   |
| T519 | Intoxication                                         | 1   | 0 Toxic effect of unspecified alcohol                          |
| T523 | Intoxication                                         | 0   | 0 Toxic effects of glycols                                     |

|      |               |     |                                                                |
|------|---------------|-----|----------------------------------------------------------------|
| T549 | Intoxication  | 1   | 0 Toxic effects of unspecified corrosive substance             |
| T589 | Intoxication  | 0   | 1 Toxic effect of carbon monoxide from unspecified source      |
| T599 | Intoxication  | 3   | 0 Toxic effect of unspecified gases, fumes and vapors          |
| T630 | Intoxication  | 2   | 0 Toxic effect of snake venom                                  |
| T659 | Intoxication  | 43  | 4 Toxic effect of unspecified substance                        |
| Y423 | Intoxication  | 3   | 1 Insulin and oral hypoglycaemic [antidiabetic] drugs          |
| Y433 | Intoxication  | 1   | 0 Other antineoplastic drugs                                   |
| Y445 | Intoxication  | 1   | 0 Thrombolytic drugs                                           |
| Y450 | Intoxication  | 5   | 0 Opioids and related analgesics                               |
| Y479 | Intoxication  | 4   | 0 Sedative, hypnotic and antianxiety drug, unspecified         |
| Y575 | Intoxication  | 2   | 0 X-ray contrast media                                         |
| Z036 | Intoxication  | 62  | 1 Encntr for obs for susp toxic eff from ingest sub ruled out  |
| I850 | Liver failure | 24  | 1 Esophageal varices                                           |
| I859 | Liver failure | 1   | 0 Secondary esophageal varices with bleeding                   |
| K703 | Liver failure | 1   | 0 Alcoholic cirrhosis of liver                                 |
| K704 | Liver failure | 2   | 0 Alcoholic hepatic failure                                    |
| K709 | Liver failure | 0   | 0 Alcoholic liver disease, unspecified                         |
| K719 | Liver failure | 1   | 0 Toxic liver disease, unspecified                             |
| K720 | Liver failure | 7   | 0 Acute and subacute hepatic failure                           |
| K721 | Liver failure | 1   | 0 Chronic hepatic failure                                      |
| K729 | Liver failure | 247 | 3 Hepatic failure, unspecified                                 |
| K746 | Liver failure | 1   | 0 Other and unspecified cirrhosis of liver                     |
| K750 | Liver failure | 0   | 1 Abscess of liver                                             |
| K754 | Liver failure | 1   | 0 Autoimmune hepatitis                                         |
| K762 | Liver failure | 1   | 0 Central hemorrhagic necrosis of liver                        |
| K767 | Liver failure | 1   | 0 Hepatorenal syndrome                                         |
| K768 | Liver failure | 1   | 0 Other specified diseases of liver                            |
| Z944 | Liver failure | 3   | 0 Liver transplant status                                      |
| C019 | Malignancy    | 1   | 0 Malignant neoplasm of base of tongue                         |
| C022 | Malignancy    | 1   | 0 Malignant neoplasm of ventral surface of tongue              |
| C031 | Malignancy    | 2   | 0 Malignant neoplasm of lower gum                              |
| C068 | Malignancy    | 1   | 0 Malignant neoplasm of ovrlp sites of and unsp parts of mouth |
| C139 | Malignancy    | 1   | 0 Malignant neoplasm of hypopharynx, unspecified               |
| C154 | Malignancy    | 2   | 0 Malignant neoplasm of middle third of esophagus              |
| C155 | Malignancy    | 3   | 0 Malignant neoplasm of lower third of esophagus               |
| C159 | Malignancy    | 3   | 0 Malignant neoplasm of esophagus, unspecified                 |
| C169 | Malignancy    | 1   | 0 Malignant neoplasm of stomach, unspecified                   |
| C220 | Malignancy    | 1   | 0 Liver cell carcinoma                                         |
| C229 | Malignancy    | 2   | 0 Malig neoplasm of liver, not specified as primary or sec     |
| C239 | Malignancy    | 1   | 0 Malignant neoplasm of gallbladder                            |

|      |                         |     |                                                                |
|------|-------------------------|-----|----------------------------------------------------------------|
| C240 | Malignancy              | 1   | 0 Malignant neoplasm of extrahepatic bile duct                 |
| C250 | Malignancy              | 4   | 0 Malignant neoplasm of head of pancreas                       |
| C252 | Malignancy              | 0   | 0 Malignant neoplasm of tail of pancreas                       |
| C259 | Malignancy              | 4   | 0 Malignant neoplasm of pancreas, unspecified                  |
| C328 | Malignancy              | 1   | 0 Malignant neoplasm of overlapping sites of larynx            |
| C329 | Malignancy              | 1   | 0 Malignant neoplasm of larynx, unspecified                    |
| C339 | Malignancy              | 1   | 0 Malignant neoplasm of trachea                                |
| C348 | Malignancy              | 1   | 0 Malignant neoplasm of overlapping sites of bronchus and lung |
| C383 | Malignancy              | 1   | 0 Malignant neoplasm of mediastinum, part unspecified          |
| C410 | Malignancy              | 1   | 0 Malignant neoplasm of bones of skull and face                |
| C412 | Malignancy              | 1   | 0 Malignant neoplasm of vertebral column                       |
| C443 | Malignancy              | 1   | 0 Oth and unsp malignant neoplasm skin/ and unsp parts of face |
| C449 | Malignancy              | 2   | 0 Other and unsp malignant neoplasm of skin, unspecified       |
| C480 | Malignancy              | 1   | 0 Malignant neoplasm of retroperitoneum                        |
| C499 | Malignancy              | 1   | 0 Malignant neoplasm of connective and soft tissue, unsp       |
| C559 | Malignancy              | 2   | 0 Malignant neoplasm of uterus, part unspecified               |
| C569 | Malignancy              | 2   | 0 Malignant neoplasm of unspecified ovary                      |
| C649 | Malignancy              | 1   | 0 Malignant neoplasm of unsp kidney, except renal pelvis       |
| C729 | Malignancy              | 6   | 0 Malignant neoplasm of central nervous system, unspecified    |
| C762 | Malignancy              | 1   | 0 Malignant neoplasm of endocrine gland, unspecified           |
| C770 | Malignancy              | 1   | 0 Malignant neoplasm of endocrine gland, unspecified           |
| C787 | Malignancy              | 6   | 0 Malignant neoplasm of endocrine gland, unspecified           |
| C809 | Malignancy              | 158 | 0 Malignant neoplasm associated with transplanted organ        |
| D339 | Malignancy              | 1   | 0 Benign neoplasm of central nervous system, unspecified       |
| D361 | Malignancy              | 1   | 0 Benign neoplasm of prph nerves and autonomic nervous sys     |
| D369 | Malignancy              | 2   | 0 Benign neoplasm, unspecified site                            |
| D391 | Malignancy              | 1   | 0 Benign neoplasm, unspecified site                            |
| D439 | Malignancy              | 5   | 0 Neoplasm of uncertain behavior of cnsl, unsp                 |
| D487 | Malignancy              | 1   | 0 Neoplasm of uncertain behavior of other specified sites      |
| D489 | Malignancy              | 13  | 0 Neoplasm of uncertain behavior, unspecified                  |
| Z859 | Malignancy              | 2   | 0 Personal history of malignant neoplasm, unspecified          |
| M419 | Musculoskeletal disease | 4   | 0 Scoliosis, unspecified                                       |
| M480 | Musculoskeletal disease | 1   | 0 Spinal stenosis                                              |
| M539 | Musculoskeletal disease | 1   | 0 Dorsopathy, unspecified                                      |
| F058 | Neurological disease    | 0   | 1 Delirium due to known physiological condition                |
| F059 | Neurological disease    | 4   | 2 Delirium due to known physiological condition                |
| G099 | Neurological disease    | 1   | 0 Sequelae of inflammatory diseases of central nervous system  |
| G122 | Neurological disease    | 5   | 0 Motor neuron disease                                         |
| G359 | Neurological disease    | 1   | 0 Multiple sclerosis                                           |
| G406 | Neurological disease    | 1   | 0 Generalized idiopathic epilepsy, intractable, w/o stat epi   |

|      |                                   |     |                                                                |
|------|-----------------------------------|-----|----------------------------------------------------------------|
| G409 | Neurological disease              | 5   | 1 Epilepsy, unspecified                                        |
| G419 | Neurological disease              | 32  | 0 Epilepsy, unsp, intractable, without status epilepticus      |
| G610 | Neurological disease              | 3   | 0 Guillain-Barre syndrome                                      |
| G629 | Neurological disease              | 1   | 0 Polyneuropathy, unspecified                                  |
| G700 | Neurological disease              | 5   | 0 Myasthenia gravis                                            |
| G719 | Neurological disease              | 1   | 0 Primary disorder of muscle, unspecified                      |
| G825 | Neurological disease              | 1   | 0 Quadriplegia                                                 |
| G839 | Neurological disease              | 0   | 1 Paralytic syndrome, unspecified                              |
| G919 | Neurological disease              | 1   | 0 Hydrocephalus, unspecified                                   |
| G934 | Neurological disease              | 1   | 0 Other and unspecified encephalopathy                         |
| G938 | Neurological disease              | 7   | 0 Other specified disorders of brain                           |
| G948 | Neurological disease              | 1   | 0 Other disorders of brain in diseases classified elsewhere    |
| G969 | Neurological disease              | 1   | 0 Disorder of central nervous system, unspecified              |
| G989 | Neurological disease              | 6   | 2 Other disorders of nervous system                            |
| G998 | Neurological disease              | 1   | 0 Oth disrd of nervous system in diseases classified elsewhere |
| P909 | Neurological disease              | 1   | 0 Convulsions of newborn                                       |
| Q079 | Neurological disease              | 1   | 0 Congenital malformation of nervous system, unspecified       |
| R400 | Neurological disease              | 37  | 1 Somnolence                                                   |
| R402 | Neurological disease              | 133 | 6 Coma                                                         |
| R410 | Neurological disease              | 14  | 2 Disorientation, unspecified                                  |
| R559 | Neurological disease              | 5   | 0 Syncope and collapse                                         |
| R568 | Neurological disease              | 163 | 4 Post traumatic seizures                                      |
| R509 | Other                             | 1   | 0 Fever, unspecified                                           |
| R600 | Other                             | 1   | 0 Localized edema                                              |
| T670 | Other                             | 1   | 0 Heatstroke and sunstroke                                     |
| T689 | Other                             | 18  | 0 Hypothermia                                                  |
| Y832 | Other                             | 9   | 0 Anastomos,bypass or grft cause abn react/compl, w/o misadvnt |
| Z038 | Other                             | 1   | 0 Encntr for obs for oth suspected diseases and cond ruled out |
| Z039 | Other                             | 2   | 0 Encntr for obs for oth suspected diseases and cond ruled out |
| K800 | Pancreatitis/cholangitis          | 1   | 0 Calculus of gallbladder with acute cholecystitis             |
| K810 | Pancreatitis/cholangitis          | 2   | 1 Acute cholecystitis                                          |
| K819 | Pancreatitis/cholangitis          | 8   | 1 Cholecystitis, unspecified                                   |
| K830 | Pancreatitis/cholangitis          | 11  | 0 Cholangitis                                                  |
| K832 | Pancreatitis/cholangitis          | 1   | 0 Perforation of bile duct                                     |
| K858 | Pancreatitis/cholangitis          | 3   | 0 Other acute pancreatitis                                     |
| K859 | Pancreatitis/cholangitis          | 51  | 8 Acute pancreatitis, unspecified                              |
| K862 | Pancreatitis/cholangitis          | 1   | 0 Cyst of pancreas                                             |
| K871 | Pancreatitis/cholangitis          | 1   | 0 Disord of GB, biliary trac and pancreas in dis classd elswhr |
| R520 | Postoperative care, not specified | 1   | 0 Pain, unspecified                                            |
| R521 | Postoperative care, not specified | 1   | 0 Pain, unspecified                                            |

|      |                                                            |     |                                                               |
|------|------------------------------------------------------------|-----|---------------------------------------------------------------|
| R529 | Postoperative care, not specified                          | 11  | 0 Pain, unspecified                                           |
| Z049 | Postoperative care, not specified                          | 376 | 5 Encounter for examination and observation for unsp reason   |
| F239 | Psychiatric disease                                        | 1   | 0 Brief psychotic disorder                                    |
| F299 | Psychiatric disease                                        | 3   | 0 Unsp psychosis not due to a substance or known physiol cond |
| F329 | Psychiatric disease                                        | 6   | 0 Major depressive disorder, single episode, unspecified      |
| F412 | Psychiatric disease                                        | 1   | 0 Generalized anxiety disorder                                |
| N109 | Renal/urologic disease                                     | 19  | 2 Acute tubulo-interstitial nephritis                         |
| N111 | Renal/urologic disease                                     | 1   | 0 Chronic obstructive pyelonephritis                          |
| N133 | Renal/urologic disease                                     | 1   | 0 Other and unspecified hydronephrosis                        |
| N170 | Renal/urologic disease                                     | 1   | 0 Acute kidney failure with tubular necrosis                  |
| N178 | Renal/urologic disease                                     | 2   | 1 Other acute kidney failure                                  |
| N179 | Renal/urologic disease                                     | 74  | 10 Acute kidney failure, unspecified                          |
| N184 | Renal/urologic disease                                     | 1   | 0 Chronic kidney disease, stage 4 (severe)                    |
| N189 | Renal/urologic disease                                     | 2   | 0 Chronic kidney disease, unspecified                         |
| N199 | Renal/urologic disease                                     | 3   | 0 Unspecified kidney failure                                  |
| N200 | Renal/urologic disease                                     | 1   | 0 Calculus of kidney                                          |
| N201 | Renal/urologic disease                                     | 0   | 1 Calculus of ureter                                          |
| N209 | Renal/urologic disease                                     | 1   | 0 Urinary calculus, unspecified                               |
| N999 | Renal/urologic disease                                     | 1   | 0 Oth postprocedural complications and disorders of GU sys    |
| Q623 | Renal/urologic disease                                     | 1   | 1 Other obstructive defects of renal pelvis and ureter        |
| J380 | Respiratory tract disease, except infection or COPD/asthma | 1   | 0 Paralysis of vocal cords and larynx                         |
| J384 | Respiratory tract disease, except infection or COPD/asthma | 29  | 0 Edema of larynx                                             |
| J387 | Respiratory tract disease, except infection or COPD/asthma | 1   | 0 Other diseases of larynx                                    |
| J398 | Respiratory tract disease, except infection or COPD/asthma | 1   | 0 Other specified diseases of upper respiratory tract         |
| J399 | Respiratory tract disease, except infection or COPD/asthma | 2   | 0 Disease of upper respiratory tract, unspecified             |
| J950 | Respiratory tract disease, except infection or COPD/asthma | 7   | 0 Tracheostomy complications                                  |
| P271 | Respiratory tract disease, except infection or COPD/asthma | 1   | 0 Bronchopulmonary dysplasia origin in the perinatal period   |
| P288 | Respiratory tract disease, except infection or COPD/asthma | 1   | 0 Other specified respiratory conditions of newborn           |
| R042 | Respiratory tract disease, except infection or COPD/asthma | 0   | 1 Hemoptysis                                                  |
| R048 | Respiratory tract disease, except infection or COPD/asthma | 1   | 0 Hemorrhage from other sites in respiratory passages         |
| R049 | Respiratory tract disease, except infection or COPD/asthma | 17  | 0 Hemorrhage from respiratory passages, unspecified           |
| R061 | Respiratory tract disease, except infection or COPD/asthma | 40  | 0 Stridor                                                     |
| R068 | Respiratory tract disease, except infection or COPD/asthma | 1   | 0 Other abnormalities of breathing                            |
| T175 | Respiratory tract disease, except infection or COPD/asthma | 1   | 0 Foreign body in bronchus                                    |
| T179 | Respiratory tract disease, except infection or COPD/asthma | 17  | 1 Foreign body in respiratory tract, part unspecified         |
| T189 | Respiratory tract disease, except infection or COPD/asthma | 2   | 1 Foreign body of alimentary tract, part unspecified          |
| T273 | Respiratory tract disease, except infection or COPD/asthma | 6   | 3 Burn of respiratory tract, part unspecified                 |
| J039 | Respiratory tract infection                                | 2   | 0 Acute tonsillitis, unspecified                              |
| J042 | Respiratory tract infection                                | 16  | 0 Acute laryngotracheitis                                     |
| J051 | Respiratory tract infection                                | 31  | 0 Acute epiglottitis                                          |



|      |                                    |     |                                                                |
|------|------------------------------------|-----|----------------------------------------------------------------|
| J069 | Respiratory tract infection        | 2   | 0 Acute upper respiratory infection, unspecified               |
| J099 | Respiratory tract infection        | 2   | 0 Influenza due to certain identified influenza viruses        |
| J100 | Respiratory tract infection        | 4   | 3 Influenza due to oth identified influenza virus w pneumonia  |
| J101 | Respiratory tract infection        | 0   | 1 Flu due to oth ident influenza virus w oth resp manifest     |
| J121 | Respiratory tract infection        | 2   | 0 Respiratory syncytial virus pneumonia                        |
| J129 | Respiratory tract infection        | 2   | 3 Viral pneumonia, unspecified                                 |
| J139 | Respiratory tract infection        | 1   | 2 Pneumonia due to Streptococcus pneumoniae                    |
| J152 | Respiratory tract infection        | 0   | 0 Pneumonia due to staphylococcus                              |
| J154 | Respiratory tract infection        | 0   | 1 Pneumonia due to other streptococci                          |
| J155 | Respiratory tract infection        | 1   | 0 Pneumonia due to Escherichia coli                            |
| J159 | Respiratory tract infection        | 167 | 44 Unspecified bacterial pneumonia                             |
| J168 | Respiratory tract infection        | 0   | 2 Pneumonia due to other specified infectious organisms        |
| J189 | Respiratory tract infection        | 9   | 4 Pneumonia, unspecified organism                              |
| J229 | Respiratory tract infection        | 3   | 1 Unspecified acute lower respiratory infection                |
| J369 | Respiratory tract infection        | 1   | 1 Peritonsillar abscess                                        |
| J390 | Respiratory tract infection        | 3   | 0 Retropharyngeal and parapharyngeal abscess                   |
| J690 | Respiratory tract infection        | 70  | 6 Pneumonitis due to inhalation of food and vomit              |
| J851 | Respiratory tract infection        | 1   | 0 Abscess of lung with pneumonia                               |
| J869 | Respiratory tract infection        | 4   | 1 Pyothorax without fistula                                    |
| J909 | Respiratory tract infection        | 3   | 0 Pleural effusion, not elsewhere classified                   |
| J958 | Respiratory tract infection        | 1   | 0 Oth intraop and postproc comp and disorders of resp sys, NEC |
| K122 | Respiratory tract infection        | 36  | 0 Cellulitis and abscess of mouth                              |
| I609 | Subarachnoid hemorrhage            | 78  | 0 Nontraumatic subarachnoid hemorrhage, unspecified            |
| T809 | Surgical and medical complications | 1   | 0 Unsp comp fol infusion, transfuse and theraputic injection   |
| T810 | Surgical and medical complications | 82  | 5 Complications of procedures, not elsewhere classified        |
| T812 | Surgical and medical complications | 6   | 1 Other postprocedural shock, sequela                          |
| T813 | Surgical and medical complications | 2   | 0 Disruption of wound, not elsewhere classified                |
| T819 | Surgical and medical complications | 5   | 1 Unspecified complication of procedure                        |
| T850 | Surgical and medical complications | 3   | 0 Mechanical complication of ventricular intracranial shunt    |
| T884 | Surgical and medical complications | 2   | 0 Failed or difficult intubation                               |
| T885 | Surgical and medical complications | 1   | 0 Other complications of anesthesia                            |
| T886 | Surgical and medical complications | 1   | 0 Anaphylactic reaction due to advrs eff drug/med prop admin   |
| T887 | Surgical and medical complications | 3   | 0 Unspecified adverse effect of drug or medicament             |
| T889 | Surgical and medical complications | 40  | 0 Complication of surgical and medical care, unspecified       |
| Y699 | Surgical and medical complications | 6   | 0 Unspecified misadventure during surgical and medical care    |
| Z948 | Transplantation                    | 1   | 0 Other transplanted organ and tissue status                   |
| Z949 | Transplantation                    | 349 | 0 Transplanted organ and tissue status, unspecified            |
| Z988 | Transplantation                    | 1   | 0 Other specified postprocedural states                        |
| S220 | Trauma                             | 5   | 0 Fracture of thoracic vertebra                                |
| S221 | Trauma                             | 0   | 0 Unspecified fracture of T11-T12 vertebra, sequela            |

|      |                        |     |                                                                |
|------|------------------------|-----|----------------------------------------------------------------|
| S222 | Trauma                 | 1   | 0 Fracture of sternum                                          |
| S224 | Trauma                 | 11  | 1 Multiple fractures of ribs                                   |
| S241 | Trauma                 | 6   | 1 Other and unspecified injuries of thoracic spinal cord       |
| S259 | Trauma                 | 3   | 0 Injury of unspecified blood vessel of thorax                 |
| S260 | Trauma                 | 1   | 0 Injury of heart with hemopericardium                         |
| S269 | Trauma                 | 1   | 0 Injury of heart, unspecified with or without hemopericardium |
| S270 | Trauma                 | 16  | 1 Traumatic pneumothorax                                       |
| S271 | Trauma                 | 8   | 0 Traumatic hemothorax                                         |
| S272 | Trauma                 | 1   | 0 Traumatic hemopneumothorax                                   |
| S273 | Trauma                 | 2   | 0 Other and unspecified injuries of lung                       |
| S311 | Trauma                 | 0   | 1 Open wound of abdominal wall w/o penetration into perit cav  |
| S328 | Trauma                 | 10  | 0 Fracture of other parts of pelvis                            |
| S341 | Trauma                 | 1   | 0 Other and unsp injury of lumbar and sacral spinal cord       |
| S359 | Trauma                 | 6   | 0 Inj unsp blood vess at abdomen, low back and pelvis level    |
| S360 | Trauma                 | 1   | 0 Injury of spleen                                             |
| S369 | Trauma                 | 16  | 0 Injury of unspecified intra-abdominal organ                  |
| S379 | Trauma                 | 1   | 0 Injury of unspecified urinary and pelvic organ               |
| T021 | Trauma                 | 0   | 0 Unspecified injury of unspecified foot, sequela              |
| T079 | Trauma                 | 435 | 66 Unspecified multiple injuries                               |
| T093 | Trauma                 | 1   | 0 Unspecified multiple injuries                                |
| T109 | Trauma                 | 1   | 1 Unspecified multiple injuries                                |
| T119 | Trauma                 | 1   | 0 Unspecified multiple injuries                                |
| T129 | Trauma                 | 6   | 2 Unspecified multiple injuries                                |
| T139 | Trauma                 | 5   | 0 Unspecified multiple injuries                                |
| T149 | Trauma                 | 15  | 0 Unspecified injury                                           |
| T300 | Trauma                 | 21  | 0 Burn of unspecified body region, unspecified degree          |
| T302 | Trauma                 | 1   | 0 Burn of unspecified body region, unspecified degree          |
| T303 | Trauma                 | 1   | 0 Burn of unspecified body region, unspecified degree          |
| T749 | Trauma                 | 8   | 0 Unspecified maltreatment, confirmed                          |
| T754 | Trauma                 | 1   | 0 Electrocution                                                |
| T792 | Trauma                 | 10  | 0 Traumatic secondary and recurrent hemorrhage and seroma      |
| T794 | Trauma                 | 1   | 0 Traumatic shock                                              |
| T796 | Trauma                 | 3   | 0 Traumatic ischemia of muscle                                 |
| T797 | Trauma                 | 1   | 0 Traumatic subcutaneous emphysema                             |
| T799 | Trauma                 | 1   | 0 Traumatic subcutaneous emphysema, sequela                    |
| G935 | Traumatic brain injury | 14  | 0 Compression of brain                                         |
| G936 | Traumatic brain injury | 2   | 0 Cerebral edema                                               |
| G952 | Traumatic brain injury | 9   | 1 Other and unspecified cord compression                       |
| G959 | Traumatic brain injury | 3   | 0 Disease of spinal cord, unspecified                          |
| S019 | Traumatic brain injury | 6   | 0 Open wound of unspecified part of head                       |

|       |                        |    |                                                          |
|-------|------------------------|----|----------------------------------------------------------|
| S021  | Traumatic brain injury | 2  | 0 Fracture of base of skull                              |
| S027  | Traumatic brain injury | 1  | 0 Fracture of mandible of other specified site, sequela  |
| S029  | Traumatic brain injury | 11 | 1 Fracture of unspecified skull and facial bones         |
| S060  | Traumatic brain injury | 8  | 0 Concussion                                             |
| S062  | Traumatic brain injury | 0  | 0 Diffuse traumatic brain injury                         |
| S063  | Traumatic brain injury | 2  | 0 Focal traumatic brain injury                           |
| S064  | Traumatic brain injury | 10 | 1 Epidural hemorrhage                                    |
| S065  | Traumatic brain injury | 51 | 2 Traumatic subdural hemorrhage                          |
| S066  | Traumatic brain injury | 10 | 0 Traumatic subarachnoid hemorrhage                      |
| S0661 | Traumatic brain injury | 1  | 0 Traumatic subarachnoid hemorrhage                      |
| S069  | Traumatic brain injury | 94 | 4 Unspecified intracranial injury                        |
| S099  | Traumatic brain injury | 1  | 0 Unspecified injury of face and head                    |
| S119  | Traumatic brain injury | 2  | 0 Open wound of unspecified part of neck                 |
| S1200 | Traumatic brain injury | 1  | 0 Unspecified fracture of first cervical vertebra        |
| S121  | Traumatic brain injury | 1  | 1 Fracture of second cervical vertebra                   |
| S122  | Traumatic brain injury | 0  | 1 Fracture of third cervical vertebra                    |
| S129  | Traumatic brain injury | 13 | 0 Fracture of neck, unspecified                          |
| S140  | Traumatic brain injury | 1  | 0 Concussion and edema of cervical spinal cord           |
| S141  | Traumatic brain injury | 15 | 1 Other and unspecified injuries of cervical spinal cord |
| S159  | Traumatic brain injury | 4  | 0 Injury of unspecified blood vessel at neck level       |
